# Supplementary material
Source: publisher figshare collection journal article supplement (https://acs.figshare.com/ndownloader/files/9501145)
Supplement: Supplementary file 1 [file 9501145]

## Supporting Information

# Rapid and Easy Extracellular Vesicle Detection on a Surface-Functionalized Power-Free Microchip toward Point-of-Care Diagnostics

*Ryo Ishihara,<sup>\*,†</sup> Tadaaki Nakajima,<sup>‡</sup> Yoshitaka Uchino,<sup>†</sup> Asuka Katagiri,<sup>†</sup> Kazuo Hosokawa,<sup>§</sup> Mizuo Maeda,<sup>§</sup> Yasuhiro Tomooka,<sup>‡</sup> and Akihiko Kikuchi<sup>†</sup>*

<sup>†</sup>Department of Materials Science and Technology and <sup>‡</sup>Department of Biological Science and Technology, Tokyo University of Science, 6-3-1 Niijuku, Katsushika, Tokyo 125-8585, Japan

<sup>§</sup>Bioengineering Laboratory, RIKEN, 2-1 Hirosawa, Wako, Saitama 351-0198, Japan

\* Corresponding author at:

Tel: +81-3-5876-1415; Fax: +81-3-5876-1639; E-mail address: r.ishihara@rs.tus.ac.jp

Keywords:

Surface-functionalized power-free microchip; electron beam-induced graft polymerization; Point-of-care diagnostics; Extracellular vesicles; Cancers

### EV detection on an anti-CD63 antibody-impregnated bare PDMS microchip

- As a control for EV detection on the surface-functionalized power-free microchip, EV detection was conducted on an anti-CD63 antibody-impregnated bare PDMS microchip.
- The microchannels of a bare PDMS microchip were filled with 1  $\mu\text{g/mL}$  of anti-CD63 antibody solution and the microchip was incubated at 310 K for 2 h in 100% humidity. This process impregnated the anti-CD63 antibody onto the microchannel surface by physical adsorption.
- After washing in ultrapure water, the microchip was degassed for 1 h and EV detection was conducted on the microchip by LFDA with same conditions as for EV detection on the SF-PF microchip.
- There was no statistically significant difference in the signal-to-blank ratios between EV-blank and blank-blank.

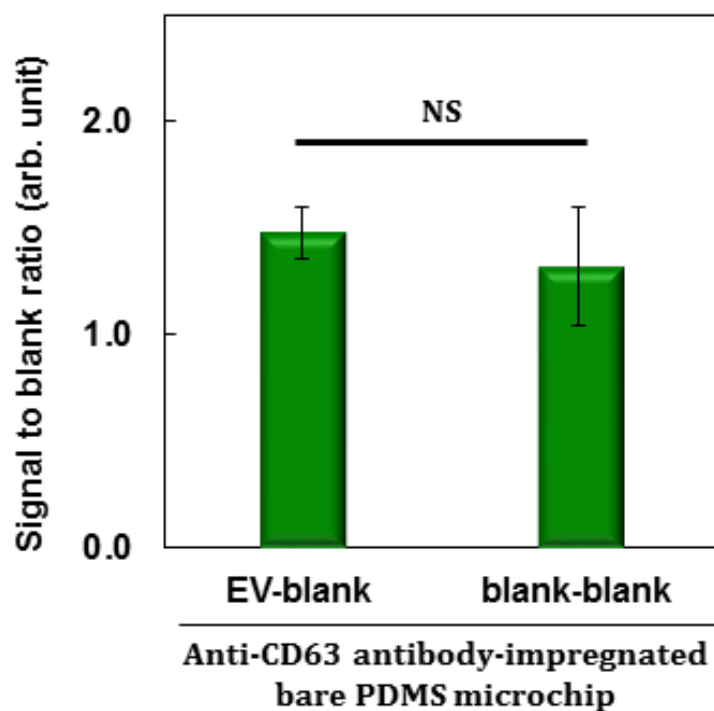

**Figure S1.** Statistical evaluation of the EV detection on an anti-CD63 antibody-impregnated bare PDMS microchip.

**Protocol for EV detection by laminar flow-assisted dendritic amplification on the SF-PF microchip**

- Blocking: blocking buffer (1% Roche Blocking Reagent, 0.02% (w/v) sodium dodecyl sulfate, 5× saline sodium citrate, and 0.05% Tween 20; Roche, Basel, Switzerland) was injected into the microchannel for 3 min.
- EV capture: one microliter of the target EV-containing PBS solution and 1.0 μL of biotinylated 10 nM anti-CD63 antibody in PBS were injected into the microchannel for 5 min to obtain the antibody-EV-antibody complex.
- Signal amplification: two amplification reagents, fluorescein isothiocyanate-conjugated streptavidin (5.0 μg/mL) and biotinylated anti-streptavidin (20 μg/mL), were injected into the microchannel.

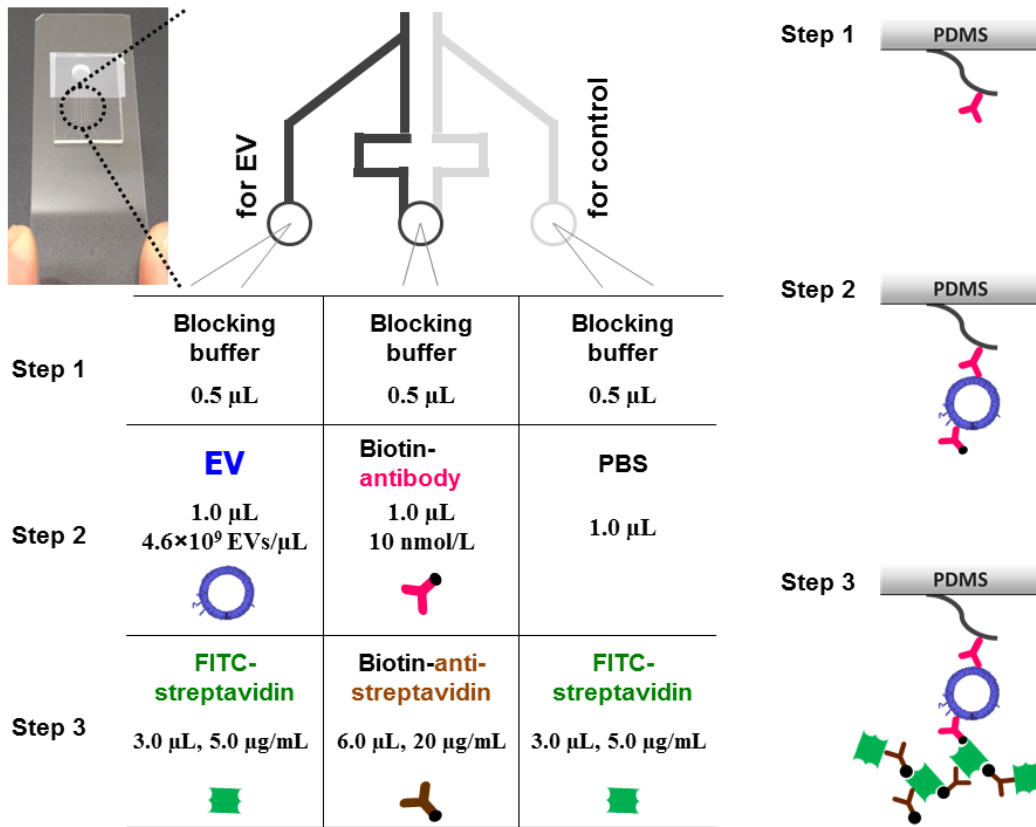

**Figure S2.** EV detection protocol: laminar flow-assisted dendritic amplification on the SF-PF microchip.
